# Supplementary material for: Construction of K+ responsive surface on SEBS to reduce the hemolysis of preserved erythrocytes
Source: RSC Adv. 2019 Feb 11;9(10):5251–8. doi: 10.1039/c8ra08215d (PMC9060672; doi:10.1039/c8ra08215d)
Supplement: RA-009-C8RA08215D-s001 [file RA-009-C8RA08215D-s001.pdf]

## Supporting Information

### Construction of K<sup>+</sup> responsive surface on SEBS to reduce the hemolysis of preserved erythrocyte

Xingkun Luan,<sup>†,‡</sup>Haozheng Wang,<sup>†</sup> Zehong Xiang,<sup>‡</sup> Jiruo Zhao,<sup>†</sup> Ying Feng,<sup>†,\*</sup>  
Qiang Shi,<sup>‡,\*</sup> Shing-Chung Wong,<sup>⊥</sup> Jinghua Yin<sup>†</sup>

<sup>†</sup> Shandong Provincial Key Laboratory of Olefin Catalysis and Polymerization/Key Laboratory of Rubber-Plastics (QUST), Ministry of Education/Shandong, Qingdao 266042, P. R. China

<sup>‡</sup> State Key Laboratory of Polymer Physics and Chemistry, Changchun Institute of Applied Chemistry, Chinese Academy of Sciences, Changchun 130022, P. R. China

<sup>⊥</sup>Department of Mechanical Engineering, University of Akron, Akron, Ohio 44325-3903, USA

#### Content:

1. Synthesis pathway for PCL-A
2. FTIR spectra of PCL-A, BCAM and electrospun PCL-A/BCAM fiber

## 1. Synthesis pathway for PCL-A

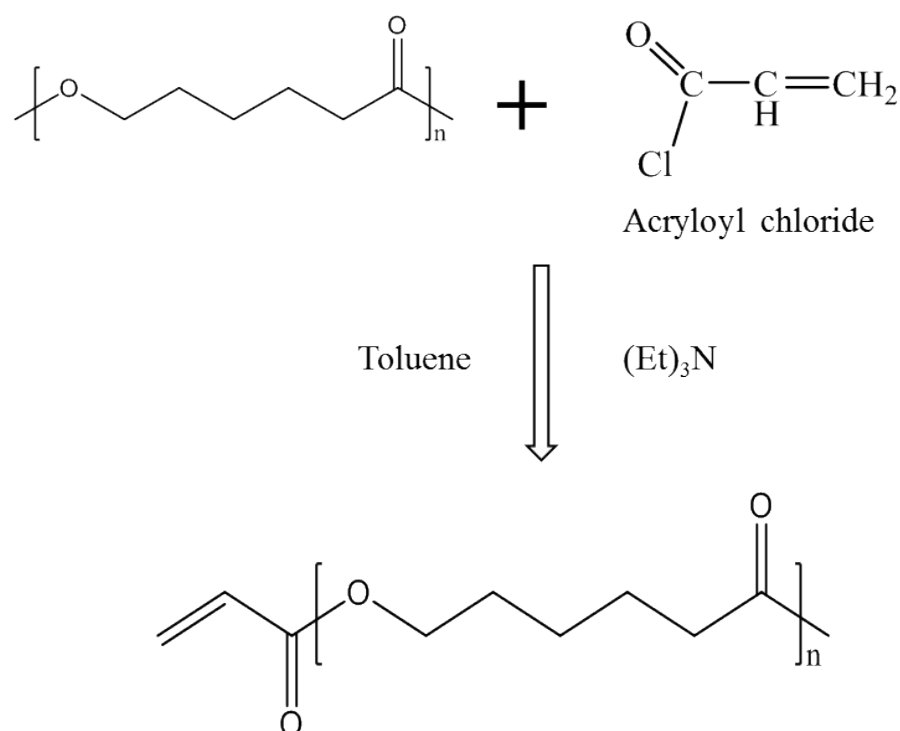

**Figure S1.** Synthesis pathway for PCL-A

## 2. FTIR spectra of PCL-A, BCAm and electrospun PCL-A/BCAm fiber

Bruker FTIR spectrometer Vertex 70 equipped with an attenuated total reflection (ATR) unit (ATR crystal  $45^\circ$ ) was used to characterize PCL-A, BCAm and electrospun PCL-A/BCAm fiber at a resolution of  $4\text{ cm}^{-1}$  for 32 scans. As shown in Figure S2, the peak at  $1729\text{ cm}^{-1}$  is attributed to the  $\text{-C=O}$  absorption of the acrylate group on PCL-A, BCAm shows the peaks at  $1664\text{ cm}^{-1}$  and  $1607\text{ cm}^{-1}$ , which are assigned to the  $\text{-C=O}$  absorption and the  $\text{-N-H}$  stretching vibration peaks, respectively. These peaks can be observed in FTIR spectra of PCL-A/BCAm fibers.

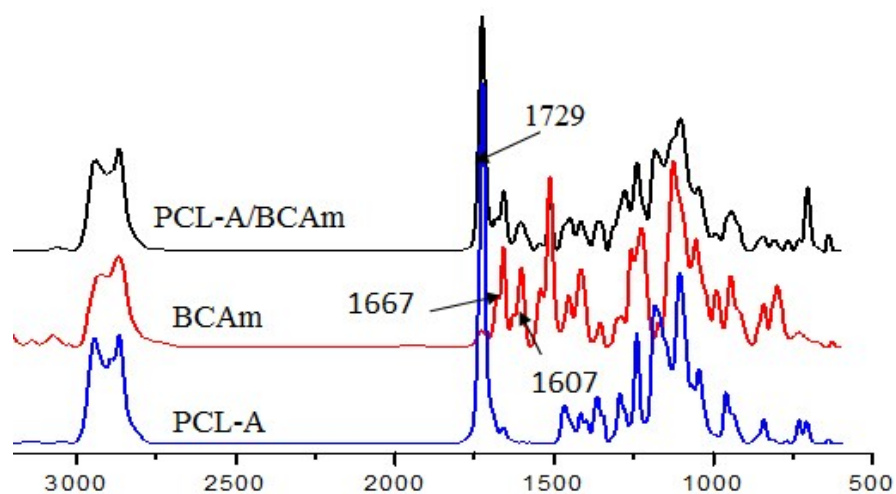

**Figure S2.** FTIR of PCL-A, BCAm and electrospun PCL-A/BCAm
